# Supplementary material for: State-of-the-Art Review: Technical and Imaging Considerations in Hybrid Transcatheter and Minimally Invasive Left Ventricular Reconstruction for Ischemic Heart Failure
Source: MDPI journal article supplement (doi:10.3390/jcm11164831), 2022-08-18
Supplement: s1 [file s1]

## Supplementary data

**Supplementary Table S1.** Echocardiographic data of hybrid left ventricular reconstruction

| Reference                   | Naar 2021                                                                                                                                                                                                                 | Klein 2019                                                                                          | Loforte 2019                                                                                               | Klein 2019                                                                                                        | Wang 2021                                                                                   |
|-----------------------------|---------------------------------------------------------------------------------------------------------------------------------------------------------------------------------------------------------------------------|-----------------------------------------------------------------------------------------------------|------------------------------------------------------------------------------------------------------------|-------------------------------------------------------------------------------------------------------------------|---------------------------------------------------------------------------------------------|
| Patients (n)                | 23                                                                                                                                                                                                                        | 35                                                                                                  | 7                                                                                                          | 9                                                                                                                 | 26                                                                                          |
| LVEF (%)                    | <p>Baseline: <math>32 \pm 7</math></p> <p>6 months: increase* (p=0.13, n=20)</p> <p>2 years: increase* (p=0.01, n=18)</p> <p>5 years: increase * (p=0.46, n=11)</p>                                                       | <p>Baseline: <math>30 \pm 8</math></p> <p>12 months: <math>36 \pm 6</math> (p=0.412, n=11)</p>      | <p>Baseline: <math>22.8 \pm 8.1</math></p> <p>Discharge: <math>35 \pm 7.2</math> (p=0.001, n=7)</p>        | <p>Baseline: <math>28 \pm 8</math></p> <p>Directly postoperatively: <math>40 \pm 10</math> (+43%, p&lt;0.001)</p> | <p>Baseline: <math>36 \pm 9</math></p> <p>9 months: <math>46 \pm 10</math> (p&lt;0.001)</p> |
| LVESVI (ml/m <sup>2</sup> ) | <p>Baseline: <math>73 \pm 27</math></p> <p>6 months: <math>51.5 \pm 22</math> (-30%, p&lt;0.001)</p> <p>2 years: <math>49.9 \pm 20</math> (-33%, p&lt;0.001)</p> <p>5 years: <math>56.1 \pm 16</math> (-31%, p=0.047)</p> | <p>Baseline: <math>75 \pm 32</math></p> <p>12 months: <math>50 \pm 12</math> (p&lt;0.001, n=11)</p> | <p>Baseline: <math>93.2 \pm 10.5</math></p> <p>Discharge: <math>52.1 \pm 15.1</math> (p&lt;0.001, n=7)</p> | <p>Baseline: <math>53 \pm 8</math></p> <p>Directly postoperatively: <math>30 \pm 11</math> (-43%, p&lt;0.001)</p> | <p>Baseline: <math>85 \pm 26</math></p> <p>9 months: <math>66 \pm 24</math></p>             |
| LVEDVI (ml/m <sup>2</sup> ) | <p>Baseline: <math>107 \pm 27</math></p> <p>6 months: decrease* (p&lt;0.001, n=20)</p> <p>2 years: decrease* (p&lt;0.001, n=18)</p> <p>5 years: decrease* (p=0.04, n=11)</p>                                              | <p>Baseline: <math>110 \pm 39</math></p> <p>12 months: <math>78 \pm 19</math> (p=0.015, n=11)</p>   | <p>Baseline: <math>137.2 \pm 20.1</math></p> <p>Discharge: <math>78 \pm 10.2</math> (p=0.001, n=7)</p>     | <p>Baseline: <math>75 \pm 23</math></p> <p>Directly postoperatively: <math>45 \pm 6</math> (-40%, p=0.001)</p>    | <p>Baseline: <math>108 \pm 33</math></p> <p>9 months: <math>91 \pm 32</math></p>            |

|                                |                                             |                                                                                   |                                            |
|--------------------------------|---------------------------------------------|-----------------------------------------------------------------------------------|--------------------------------------------|
| <b>Tricuspid regurgitation</b> | Baseline: grade -<br>0.64 ± 0.6 (scale 0-4) | No change in 6 (86%) patients; decrease from moderate to mild in 1 (14%) patient. | Baseline: grade -<br>0.5 ± 0.6 (scale 0-4) |
|                                | 6 months: grade 1.68 ± 0.8 (p<0.001)        |                                                                                   | Directly postoperatively: 0.7 ± 1.0        |
|                                | 2 years: grade 1.18 ± 0.8 (p=0.08)          |                                                                                   | Increase in TR in 2 (22%) patients         |
|                                | 5 years: grade 1.65 ± 1.0 (p=0.003)         |                                                                                   |                                            |

Values are mean ± SD or n (%). Abbreviations: LVEF, left ventricular ejection fraction; LVEDVI, left ventricular end-diastolic volume index; LVESVI, left ventricular end-systolic volume index; -, not reported; \* not specified.

**Supplementary Table S2.** Functional data of hybrid left ventricular reconstruction

| Reference         | Naar 2021                           | Klein 2019                           | Loforte 2019                             | Klein 2019                         | Wang 2021                            |
|-------------------|-------------------------------------|--------------------------------------|------------------------------------------|------------------------------------|--------------------------------------|
| <b>NYHA class</b> | Baseline: 2.3 ± 0.5 (n=23)          | Baseline: 2.6 ± 0.5 (n=35)           | Baseline: 3.4 ± 0.6 (n=7)                | Baseline: 2.7 ± 0.4 (n=9)          | Baseline: 2.7 ± 0.6                  |
|                   | 6 months: decrease * (p=0.27; n=20) | 6 months: 1.8 ± 0.7 (p=0.001; n=26)  | 190 ± 105 days: 1.4 ± 0.9 (p=0.001; n=7) | Discharge: 2.3 ± 0.7 (p=0.58; n=8) | 9 months: 1.7 ± 0.7 (p<0.001; n=26)  |
|                   | 2 years: decrease* (p=0.11; n=18)   | 12 months: 1.7 ± 0.6 (p=0.001; n=19) |                                          |                                    |                                      |
|                   | 5 years: 1.6 ± 0.7 (p=0.01; n=11)   |                                      |                                          |                                    |                                      |
| <b>6-MWT</b>      | Baseline: 381 ± 103 (n=23)          | Baseline: 365 ± 90 (n=33)            | -                                        | -                                  | Baseline: 369 ± 40 m (n=26)          |
|                   | 6 months: 392 ± 97 (p=ns, n=20)     | 6 months: 426 ± 99 (p=0.004; n=23)   |                                          |                                    | 9 months: 462 ± 61 m (p<0.001; n=26) |
|                   | 2 years: 432 ± 77 (p=0.06; n=17)    | 12 months: 450 ± 75 (p=0.002; n=17)  |                                          |                                    |                                      |
|                   | 5 years: - (p=ns; n=10)             |                                      |                                          |                                    |                                      |
| <b>MLHFQ</b>      | Baseline: 22 (n=23)                 | Baseline: 42 ± 21                    | -                                        | -                                  | -                                    |
|                   |                                     | 6 months: 18 ± 14 (p<0.001; n=26)    |                                          |                                    |                                      |

|                     |                    |
|---------------------|--------------------|
| 6 months:           | 12 months: 26 ±    |
| decrease* (p=0.82;  | 21 (p=0.001; n=18) |
| n=19)               |                    |
| 2 years: decrease * |                    |
| (p=0.61; n=16)      |                    |
| 5 years: decrease * |                    |
| (p=0.91; n=10)      |                    |

Values are mean ± SD. Abbreviations: MLHFQ, Minnesota Living with Heart Failure Questionnaire; NYHA, New York Heart Association; 6-MWT, six minute walk test; ns, not significant; -, not reported; \*not specified.
